# Supplementary material
Source: PubMed Central journal article supplement (PMC2892212)
Supplement: NIHMS211507-supplement-FigS1.pdf [file NIHMS211507-supplement-FigS1.pdf]

Figure S1

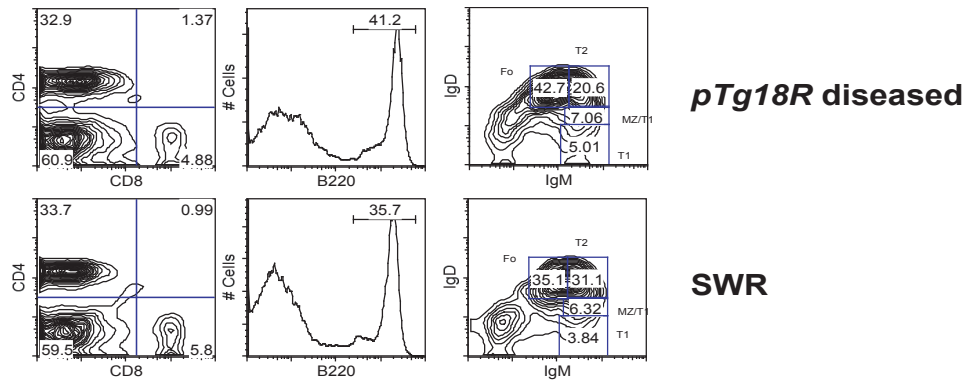

Figure S2

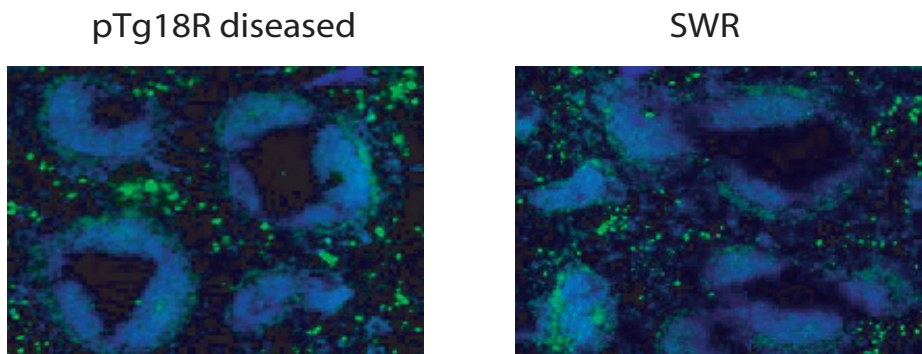

Spleen sections of diseased pTg18R vs a Tg negative littermate (SWR). FigS2 IgM (green) and IgD (blue). As shown in the figures there are no major changes relative to lymphocytes subpopulations and B cell follicle organization, between pTg18R diseased and control mice.
